# Supplementary material for: Trend in Hypertension Prevalence and Health Behaviors among the Brazilian Adult Population: 2006–2019
Source: MDPI journal article supplement (doi:10.3390/obesities3020012), 2023-04-06
Supplement: s1 [file s1]

Archive with 1 entries (1 files):
- obesities-2256934-supplementary.pdf
