# Supplementary material for: Trend in Hypertension Prevalence and Health Behaviors among the Brazilian Adult Population: 2006–2019
Source: MDPI journal article supplement (doi:10.3390/obesities3020012), 2023-04-06
Supplement: s1 [file s1 › obesities-2256934-supplementary.pdf]

## Supplement

Table S1. Health protective and risk factors analyzed and period for which the indicator is available.  
Vigitel Brazil, 2006-2019.

| Indicator                                                   | Definition                                                                                                             | Available for the period            |
|-------------------------------------------------------------|------------------------------------------------------------------------------------------------------------------------|-------------------------------------|
| <b>Protective factors</b>                                   |                                                                                                                        |                                     |
| Recommended intake of fruits and vegetables                 | Consumption of at least 5 portions of fruits and vegetables per day                                                    | 2008 through 2019                   |
| Regular intake of fruits and vegetables                     | Consumption of fruits and vegetables on $\geq 5$ days of the week                                                      | 2008 through 2019                   |
| Regular intake of fruits                                    | Consumption of fruits on $\geq 5$ days of the week                                                                     | 2008 through 2019                   |
| Regular intake of vegetables                                | Consumption of vegetables on $\geq 5$ days of the week                                                                 | 2008 through 2019                   |
| Regular intake of beans                                     | Consumption of beans on $\geq 5$ days of the week                                                                      | 2007 through 2019 (except for 2018) |
| Leisure-time exercising                                     | Leisure-time physical activity for at least 150 minutes/week (moderate intensity) or 75 minutes (vigorous intensity)   | 2009 through 2019                   |
| <b>Risk factors</b>                                         |                                                                                                                        |                                     |
| Fat-rich meat intake                                        | Consumption of meats with apparent fat and/or chicken with skin on $\geq 1$ days of the week                           | 2007 through 2016                   |
| Whole milk intake                                           | Consumption of milk with full fat content on $\geq 1$ days of the week                                                 | 2009 through 2016                   |
| Regular intake of soft drinks and sugar-sweetened beverages | Consumption of beverages (soft drinks or artificial juice) with sugar on $\geq 5$ days of the week                     | 2007 through 2019                   |
| Regular intake of sweets                                    | Consumption of sweets on $\geq 5$ days of the week                                                                     | 2012 through 2016                   |
| Abusive consumption of alcoholic beverages                  | Abusive consumption in the last 30 days ( $\geq 5$ drinks [men] or $\geq 4$ drinks [women]) of alcohol in a single day | 2006 through 2019                   |
| Smoking                                                     | Smoking regardless of frequency and quantity                                                                           | 2006 through 2019                   |
| Overweight                                                  | Body Mass Index (BMI) $\geq 25$ kg/m <sup>2</sup>                                                                      | 2006 through 2019                   |
| Obesity                                                     | Body Mass Index (BMI) $\geq 30$ kg/m <sup>2</sup>                                                                      | 2006 through 2019                   |
